# Supplementary material for: Rhizosphere Bacterial Community Characteristics over Different Years of Sugarcane Ratooning in Consecutive Monoculture
Source: Biomed Res Int. 2019 Nov 11;2019:4943150. doi: 10.1155/2019/4943150 (PMC6878781; doi:10.1155/2019/4943150)
Supplement: Supplementary Materials — Table S1: good quality sequences that were used for further analysis after basic quality control for treatments of three-year ratooning sugarcane (2015) and the newly planted sugarcane (2018). Figure S1: the abundance distributions of the seven phyla between the rhizospheres of the newly planted sugarcane (2018) and the three-year ratooning sugarcane (2015). Figure S2: heatmap of the top 50 classified bacterial genera of the rhizosphere of the newly planted sugarcane (2018) and the three-year ratooning sugarcane (2015) and Metagenome at level 3. [file 4943150.f1.zip]

Archive with 2 entries (2 files):
- 4943150.f1/Supplement materials-KEGG.xls
- 4943150.f1/Supplement table and figure.doc
