# Supplementary material for: Rhizosphere Bacterial Community Characteristics over Different Years of Sugarcane Ratooning in Consecutive Monoculture
Source: Biomed Res Int. 2019 Nov 11;2019:4943150. doi: 10.1155/2019/4943150 (PMC6878781; doi:10.1155/2019/4943150)
Supplement: Supplementary Materials — Table S1: good quality sequences that were used for further analysis after basic quality control for treatments of three-year ratooning sugarcane (2015) and the newly planted sugarcane (2018). Figure S1: the abundance distributions of the seven phyla between the rhizospheres of the newly planted sugarcane (2018) and the three-year ratooning sugarcane (2015). Figure S2: heatmap of the top 50 classified bacterial genera of the rhizosphere of the newly planted sugarcane (2018) and the three-year ratooning sugarcane (2015) and Metagenome at level 3. [file 4943150.f1.zip › 4943150.f1/Supplement materials-KEGG.xls]

## Sheet: metagenome_at_level3
# Constructed from biom file
#OTU ID	2018-1	2018-2	2018-3	2015-1	2015-2	2015-3	KEGG_Pathways
1,1,1-Trichloro-2,2-bis(4-chlorophenyl)ethane (DDT) degradation	220	249	281	325	536	547	Metabolism; Xenobiotics Biodegradation and Metabolism; 1,1,1-Trichloro-2,2-bis(4-chlorophenyl)ethane (DDT) degradation
ABC transporters	912760	670112	621539	852442	913334	1060889	Environmental Information Processing; Membrane Transport; ABC transporters
Adherens junction	48	46	90	68	70	73	Cellular Processes; Cell Communication; Adherens junction
Adipocytokine signaling pathway	33149	22251	19694	29327	35120	36837	Organismal Systems; Endocrine System; Adipocytokine signaling pathway
African trypanosomiasis	10372	6346	5411	8068	8115	8962	Human Diseases; Infectious Diseases; African trypanosomiasis
Alanine, aspartate and glutamate metabolism	299982	204529	191027	266246	310927	324703	Metabolism; Amino Acid Metabolism; Alanine, aspartate and glutamate metabolism
Aldosterone-regulated sodium reabsorption	0	0	1	2	1	6	Organismal Systems; Excretory System; Aldosterone-regulated sodium reabsorption
Alzheimer's disease	33804	24949	21765	27469	33461	34485	Human Diseases; Neurodegenerative Diseases; Alzheimer's disease
Amino acid metabolism	74783	49623	47524	63627	74258	76817	Unclassified; Metabolism; Amino acid metabolism
Amino acid related enzymes	384450	265264	251057	342200	404339	416567	Metabolism; Amino Acid Metabolism; Amino acid related enzymes
Amino sugar and nucleotide sugar metabolism	375858	236299	222937	325556	369912	387639	Metabolism; Carbohydrate Metabolism; Amino sugar and nucleotide sugar metabolism
Aminoacyl-tRNA biosynthesis	301439	208968	196243	270567	322361	328719	Genetic Information Processing; Translation; Aminoacyl-tRNA biosynthesis
Aminobenzoate degradation	160113	128924	106912	152285	192434	196627	Metabolism; Xenobiotics Biodegradation and Metabolism; Aminobenzoate degradation
Amoebiasis	7804	4133	4400	5828	5684	6715	Human Diseases; Infectious Diseases; Amoebiasis
Amyotrophic lateral sclerosis (ALS)	18840	14646	11479	15568	19118	19143	Human Diseases; Neurodegenerative Diseases; Amyotrophic lateral sclerosis (ALS)
Antigen processing and presentation	5110	3413	3579	4453	4708	4858	Organismal Systems; Immune System; Antigen processing and presentation
Apoptosis	8092	6622	4843	5975	8598	8469	Cellular Processes; Cell Growth and Death; Apoptosis
Arachidonic acid metabolism	32382	21286	19922	25958	30702	32364	Metabolism; Lipid Metabolism; Arachidonic acid metabolism
Arginine and proline metabolism	387531	272202	254553	350574	406235	427332	Metabolism; Amino Acid Metabolism; Arginine and proline metabolism
Arrhythmogenic right ventricular cardiomyopathy (ARVC)	48	46	90	68	70	73	Human Diseases; Cardiovascular Diseases; Arrhythmogenic right ventricular cardiomyopathy (ARVC)
Ascorbate and aldarate metabolism	64185	41453	36637	52501	59794	62295	Metabolism; Carbohydrate Metabolism; Ascorbate and aldarate metabolism
Atrazine degradation	14540	10944	9813	13465	13534	17325	Metabolism; Xenobiotics Biodegradation and Metabolism; Atrazine degradation
Bacterial chemotaxis	192879	134139	126331	162382	196498	212511	Cellular Processes; Cell Motility; Bacterial chemotaxis
Bacterial invasion of epithelial cells	110	98	141	116	118	145	Human Diseases; Infectious Diseases; Bacterial invasion of epithelial cells
Bacterial motility proteins	560631	364439	345918	458971	516104	566920	Cellular Processes; Cell Motility; Bacterial motility proteins
Bacterial secretion system	267115	179305	164637	221836	260511	283354	Environmental Information Processing; Membrane Transport; Bacterial secretion system
Bacterial toxins	35139	20427	20058	28270	29612	33385	Environmental Information Processing; Signaling Molecules and Interaction; Bacterial toxins
Basal transcription factors	1074	1256	1032	1813	2537	2162	Genetic Information Processing; Transcription; Basal transcription factors
Base excision repair	164752	109221	101556	147898	165451	174356	Genetic Information Processing; Replication and Repair; Base excision repair
Benzoate degradation	174219	142412	118363	165101	207161	211971	Metabolism; Xenobiotics Biodegradation and Metabolism; Benzoate degradation
Betalain biosynthesis	4072	1973	1715	2921	3146	3751	Metabolism; Biosynthesis of Other Secondary Metabolites; Betalain biosynthesis
Bile secretion	767	1299	849	1694	2518	2229	Organismal Systems; Digestive System; Bile secretion
Biosynthesis and biodegradation of secondary metabolites	18631	14707	12762	17174	21246	22914	Unclassified; Metabolism; Biosynthesis and biodegradation of secondary metabolites
Biosynthesis of 12-, 14- and 16-membered macrolides	321	240	197	438	376	375	Metabolism; Metabolism of Terpenoids and Polyketides; Biosynthesis of 12-, 14- and 16-membered macrolides
Biosynthesis of ansamycins	17948	11628	11478	14501	16871	18385	Metabolism; Metabolism of Terpenoids and Polyketides; Biosynthesis of ansamycins
Biosynthesis of siderophore group nonribosomal peptides	17940	11818	11005	16050	16238	18643	Metabolism; Metabolism of Terpenoids and Polyketides; Biosynthesis of siderophore group nonribosomal peptides
Biosynthesis of type II polyketide backbone	1310	361	431	584	312	361	Metabolism; Metabolism of Terpenoids and Polyketides; Biosynthesis of type II polyketide backbone
Biosynthesis of type II polyketide products	740	273	184	296	226	243	Metabolism; Metabolism of Terpenoids and Polyketides; Biosynthesis of type II polyketide products
Biosynthesis of unsaturated fatty acids	105683	70109	65680	90940	106110	109317	Metabolism; Lipid Metabolism; Biosynthesis of unsaturated fatty acids
Biosynthesis of vancomycin group antibiotics	20927	12542	12367	18175	20357	20525	Metabolism; Metabolism of Terpenoids and Polyketides; Biosynthesis of vancomycin group antibiotics
Biotin metabolism	35744	27592	26210	32613	44270	42366	Metabolism; Metabolism of Cofactors and Vitamins; Biotin metabolism
Bisphenol degradation	42982	33771	27752	39607	48337	49788	Metabolism; Xenobiotics Biodegradation and Metabolism; Bisphenol degradation
Bladder cancer	3364	2263	2276	3159	2127	3067	Human Diseases; Cancers; Bladder cancer
Butanoate metabolism	333346	255923	224828	315173	373353	391214	Metabolism; Carbohydrate Metabolism; Butanoate metabolism
Butirosin and neomycin biosynthesis	21194	12621	12304	18788	19568	21213	Metabolism; Biosynthesis of Other Secondary Metabolites; Butirosin and neomycin biosynthesis
C5-Branched dibasic acid metabolism	100513	70447	65728	90473	101722	109430	Metabolism; Carbohydrate Metabolism; C5-Branched dibasic acid metabolism
CAM ligands	3	3	2	6	2	3	Environmental Information Processing; Signaling Molecules and Interaction; CAM ligands
Caffeine metabolism	2060	1164	797	1870	1350	1606	Metabolism; Biosynthesis of Other Secondary Metabolites; Caffeine metabolism
Calcium signaling pathway	6	12	6	20	8	34	Environmental Information Processing; Signal Transduction; Calcium signaling pathway
Caprolactam degradation	80529	67267	56704	79337	97197	99255	Metabolism; Xenobiotics Biodegradation and Metabolism; Caprolactam degradation
Carbohydrate digestion and absorption	1019	503	501	679	723	1397	Organismal Systems; Digestive System; Carbohydrate digestion and absorption
Carbohydrate metabolism	48572	28722	26664	41182	45639	47503	Unclassified; Metabolism; Carbohydrate metabolism
Carbon fixation in photosynthetic organisms	142011	99720	94312	126491	146359	154022	Metabolism; Energy Metabolism; Carbon fixation in photosynthetic organisms
Carbon fixation pathways in prokaryotes	327407	232746	218374	294140	346713	358482	Metabolism; Energy Metabolism; Carbon fixation pathways in prokaryotes
Cardiac muscle contraction	15741	11023	10016	12196	13948	14628	Organismal Systems; Circulatory System; Cardiac muscle contraction
Carotenoid biosynthesis	19911	13773	12205	16689	20348	21464	Metabolism; Metabolism of Terpenoids and Polyketides; Carotenoid biosynthesis
Cell cycle	0	0	0	0	0	0	Cellular Processes; Cell Growth and Death; Cell cycle
Cell cycle - Caulobacter	160772	117240	106171	137275	178860	177006	Cellular Processes; Cell Growth and Death; Cell cycle - Caulobacter
Cell cycle - yeast	0	0	0	0	0	0	Cellular Processes; Cell Growth and Death; Cell cycle - yeast
Cell division	21067	15001	14324	17441	20692	21852	Unclassified; Cellular Processes and Signaling; Cell division
Cell motility and secretion	95478	61387	62091	77665	99352	97365	Unclassified; Cellular Processes and Signaling; Cell motility and secretion
Cellular antigens	33689	21727	20380	26444	30183	32254	Environmental Information Processing; Signaling Molecules and Interaction; Cellular antigens
Chagas disease (American trypanosomiasis)	12009	6888	6185	8805	9203	9846	Human Diseases; Infectious Diseases; Chagas disease (American trypanosomiasis)
Chaperones and folding catalysts	286570	191146	185800	247203	280431	296521	Genetic Information Processing; Folding, Sorting and Degradation; Chaperones and folding catalysts
Chloroalkane and chloroalkene degradation	106720	77809	65551	90642	114788	112222	Metabolism; Xenobiotics Biodegradation and Metabolism; Chloroalkane and chloroalkene degradation
Chlorocyclohexane and chlorobenzene degradation	49902	36238	29454	41307	50895	51390	Metabolism; Xenobiotics Biodegradation and Metabolism; Chlorocyclohexane and chlorobenzene degradation
Cholinergic synapse	0	0	0	0	0	0	Organismal Systems; Nervous System; Cholinergic synapse
Chromosome	382024	262032	246885	331654	395906	406833	Genetic Information Processing; Replication and Repair; Chromosome
Chronic myeloid leukemia	316	134	178	240	225	258	Human Diseases; Cancers; Chronic myeloid leukemia
Circadian rhythm - plant	5672	3825	3400	5491	6312	6322	Organismal Systems; Environmental Adaptation; Circadian rhythm - plant
Citrate cycle (TCA cycle)	246484	177151	165237	234542	259336	278576	Metabolism; Carbohydrate Metabolism; Citrate cycle (TCA cycle)
Clavulanic acid biosynthesis	45	69	39	70	42	41	Metabolism; Biosynthesis of Other Secondary Metabolites; Clavulanic acid biosynthesis
Colorectal cancer	8069	6554	4780	5903	8482	8027	Human Diseases; Cancers; Colorectal cancer
Complement and coagulation cascades	0	0	0	0	0	0	Organismal Systems; Immune System; Complement and coagulation cascades
Cyanoamino acid metabolism	93912	59714	54710	79145	90799	95725	Metabolism; Metabolism of Other Amino Acids; Cyanoamino acid metabolism
Cysteine and methionine metabolism	268937	179550	169799	232172	271271	274229	Metabolism; Amino Acid Metabolism; Cysteine and methionine metabolism
Cytochrome P450	72	129	134	112	127	118	Metabolism; Enzyme Families; Cytochrome P450
Cytokine receptors	0	0	0	0	0	0	Environmental Information Processing; Signaling Molecules and Interaction; Cytokine receptors
Cytokine-cytokine receptor interaction	0	0	0	0	0	0	Environmental Information Processing; Signaling Molecules and Interaction; Cytokine-cytokine receptor interaction
Cytoskeleton proteins	66411	49442	44920	60915	73994	76935	Cellular Processes; Cell Motility; Cytoskeleton proteins
Cytosolic DNA-sensing pathway	0	0	0	0	0	0	Organismal Systems; Immune System; Cytosolic DNA-sensing pathway
D-Alanine metabolism	24152	17813	16805	23074	26720	28187	Metabolism; Metabolism of Other Amino Acids; D-Alanine metabolism
D-Arginine and D-ornithine metabolism	2517	1927	1830	1988	2217	2319	Metabolism; Metabolism of Other Amino Acids; D-Arginine and D-ornithine metabolism
D-Glutamine and D-glutamate metabolism	35796	24360	23124	31866	39534	40296	Metabolism; Metabolism of Other Amino Acids; D-Glutamine and D-glutamate metabolism
DNA repair and recombination proteins	743011	509121	480018	665777	777270	799933	Genetic Information Processing; Replication and Repair; DNA repair and recombination proteins
DNA replication	138216	99469	93489	127962	150585	154916	Genetic Information Processing; Replication and Repair; DNA replication
DNA replication proteins	240476	171860	161604	218343	262401	267161	Genetic Information Processing; Replication and Repair; DNA replication proteins
Dilated cardiomyopathy (DCM)	48	46	90	68	70	73	Human Diseases; Cardiovascular Diseases; Dilated cardiomyopathy (DCM)
Dioxin degradation	20407	17495	13633	18082	28665	26284	Metabolism; Xenobiotics Biodegradation and Metabolism; Dioxin degradation
Drug metabolism - cytochrome P450	80298	59075	49787	64005	78666	82526	Metabolism; Xenobiotics Biodegradation and Metabolism; Drug metabolism - cytochrome P450
Drug metabolism - other enzymes	79994	52430	48403	71772	77007	82106	Metabolism; Xenobiotics Biodegradation and Metabolism; Drug metabolism - other enzymes
ECM-receptor interaction	3	3	2	6	2	3	Environmental Information Processing; Signaling Molecules and Interaction; ECM-receptor interaction
Electron transfer carriers	7605	5204	4644	7090	7077	7876	Unclassified; Cellular Processes and Signaling; Electron transfer carriers
Endocrine and other factor-regulated calcium reabsorption	0	0	0	0	0	0	Organismal Systems; Excretory System; Endocrine and other factor-regulated calcium reabsorption
Endocytosis	70	17	15	29	40	24	Cellular Processes; Transport and Catabolism; Endocytosis
Energy metabolism	257631	178796	166124	222199	265689	276081	Unclassified; Metabolism; Energy metabolism
Epithelial cell signaling in Helicobacter pylori infection	5338	4508	4765	5021	7683	7510	Human Diseases; Infectious Diseases; Epithelial cell signaling in Helicobacter pylori infection
ErbB signaling pathway	0	0	0	0	0	0	Environmental Information Processing; Signal Transduction; ErbB signaling pathway
Ether lipid metabolism	17737	7795	7252	12207	12969	14481	Metabolism; Lipid Metabolism; Ether lipid metabolism
Ethylbenzene degradation	22984	17801	15453	21353	25023	26640	Metabolism; Xenobiotics Biodegradation and Metabolism; Ethylbenzene degradation
Fat digestion and absorption	0	0	0	0	0	0	Organismal Systems; Digestive System; Fat digestion and absorption
Fatty acid biosynthesis	190433	129132	121522	164125	198845	201637	Metabolism; Lipid Metabolism; Fatty acid biosynthesis
Fatty acid elongation in mitochondria	97	105	199	135	157	214	Metabolism; Lipid Metabolism; Fatty acid elongation in mitochondria
Fatty acid metabolism	243709	190279	162374	228413	283135	289168	Metabolism; Lipid Metabolism; Fatty acid metabolism
Fc epsilon RI signaling pathway	0	0	0	0	0	0	Organismal Systems; Immune System; Fc epsilon RI signaling pathway
Fc gamma R-mediated phagocytosis	70	17	15	29	40	24	Organismal Systems; Immune System; Fc gamma R-mediated phagocytosis
Flagellar assembly	257357	164210	151464	208220	228972	258085	Cellular Processes; Cell Motility; Flagellar assembly
Flavone and flavonol biosynthesis	4377	1997	2072	3491	3763	4104	Metabolism; Biosynthesis of Other Secondary Metabolites; Flavone and flavonol biosynthesis
Flavonoid biosynthesis	12890	7843	7439	11272	12409	12929	Metabolism; Biosynthesis of Other Secondary Metabolites; Flavonoid biosynthesis
Fluorobenzoate degradation	28700	22619	17455	25106	34430	33168	Metabolism; Xenobiotics Biodegradation and Metabolism; Fluorobenzoate degradation
Focal adhesion	51	49	92	74	72	76	Cellular Processes; Cell Communication; Focal adhesion
Folate biosynthesis	134917	94278	89635	121781	141142	148474	Metabolism; Metabolism of Cofactors and Vitamins; Folate biosynthesis
Fructose and mannose metabolism	173534	117157	109182	158065	180805	187709	Metabolism; Carbohydrate Metabolism; Fructose and mannose metabolism
Function unknown	526806	346577	326128	441086	513114	537287	Unclassified; Poorly Characterized; Function unknown
G protein-coupled receptors	0	4	0	0	0	0	Environmental Information Processing; Signaling Molecules and Interaction; G protein-coupled receptors
GTP-binding proteins	0	0	0	0	0	0	Environmental Information Processing; Signaling Molecules and Interaction; GTP-binding proteins
Galactose metabolism	169618	97785	92242	143168	153296	166119	Metabolism; Carbohydrate Metabolism; Galactose metabolism
Gastric acid secretion	0	0	0	0	0	0	Organismal Systems; Digestive System; Gastric acid secretion
General function prediction only	1147656	767864	722565	996219	1164955	1214415	Unclassified; Poorly Characterized; General function prediction only
Geraniol degradation	117143	93219	80801	112863	135918	139003	Metabolism; Metabolism of Terpenoids and Polyketides; Geraniol degradation
Germination	47	520	29	33	89	66	Unclassified; Cellular Processes and Signaling; Germination
Glioma	0	0	0	0	0	0	Human Diseases; Cancers; Glioma
Glutamatergic synapse	26800	18422	17738	25177	26790	29441	Organismal Systems; Nervous System; Glutamatergic synapse
Glutathione metabolism	158183	113230	100594	131482	150477	162987	Metabolism; Metabolism of Other Amino Acids; Glutathione metabolism
Glycan bindng proteins	2	1	2	0	0	6	Environmental Information Processing; Signaling Molecules and Interaction; Glycan bindng proteins
Glycan biosynthesis and metabolism	19948	12574	12234	15390	18702	18767	Unclassified; Metabolism; Glycan biosynthesis and metabolism
Glycerolipid metabolism	104892	69639	64420	93400	105203	111352	Metabolism; Lipid Metabolism; Glycerolipid metabolism
Glycerophospholipid metabolism	171957	112710	106609	144379	172773	180003	Metabolism; Lipid Metabolism; Glycerophospholipid metabolism
Glycine, serine and threonine metabolism	316360	213241	198312	274824	311891	333506	Metabolism; Amino Acid Metabolism; Glycine, serine and threonine metabolism
Glycolysis / Gluconeogenesis	314546	224601	206021	297389	329448	354755	Metabolism; Carbohydrate Metabolism; Glycolysis / Gluconeogenesis
Glycosaminoglycan biosynthesis - chondroitin sulfate	0	0	0	0	0	0	Metabolism; Glycan Biosynthesis and Metabolism; Glycosaminoglycan biosynthesis - chondroitin sulfate
Glycosaminoglycan degradation	16986	8690	9469	13564	14657	16923	Metabolism; Glycan Biosynthesis and Metabolism; Glycosaminoglycan degradation
Glycosphingolipid biosynthesis - ganglio series	11603	5975	6180	8741	9693	10534	Metabolism; Glycan Biosynthesis and Metabolism; Glycosphingolipid biosynthesis - ganglio series
Glycosphingolipid biosynthesis - globo series	26284	13179	13448	20661	22366	23767	Metabolism; Glycan Biosynthesis and Metabolism; Glycosphingolipid biosynthesis - globo series
Glycosphingolipid biosynthesis - lacto and neolacto series	2	29	6	33	34	365	Metabolism; Glycan Biosynthesis and Metabolism; Glycosphingolipid biosynthesis - lacto and neolacto series
Glycosylphosphatidylinositol(GPI)-anchor biosynthesis	0	0	0	0	0	2	Metabolism; Glycan Biosynthesis and Metabolism; Glycosylphosphatidylinositol(GPI)-anchor biosynthesis
Glycosyltransferases	132546	80174	77726	107448	121543	126937	Metabolism; Glycan Biosynthesis and Metabolism; Glycosyltransferases
Glyoxylate and dicarboxylate metabolism	258708	182454	167055	223045	257548	276510	Metabolism; Carbohydrate Metabolism; Glyoxylate and dicarboxylate metabolism
GnRH signaling pathway	70	17	15	29	40	24	Organismal Systems; Endocrine System; GnRH signaling pathway
Hedgehog signaling pathway	0	0	0	0	0	0	Environmental Information Processing; Signal Transduction; Hedgehog signaling pathway
Hematopoietic cell lineage	4	4	4	5	8	1	Organismal Systems; Immune System; Hematopoietic cell lineage
Hepatitis C	0	0	0	0	0	0	Human Diseases; Infectious Diseases; Hepatitis C
Histidine metabolism	188477	125683	117533	164259	189554	196098	Metabolism; Amino Acid Metabolism; Histidine metabolism
Homologous recombination	187552	135909	128759	174255	210004	211344	Genetic Information Processing; Replication and Repair; Homologous recombination
Huntington's disease	40786	29323	25598	32345	39436	39598	Human Diseases; Neurodegenerative Diseases; Huntington's disease
Hypertrophic cardiomyopathy (HCM)	4380	1967	2002	2872	2839	3041	Human Diseases; Cardiovascular Diseases; Hypertrophic cardiomyopathy (HCM)
Indole alkaloid biosynthesis	3542	1615	1531	2495	2980	3475	Metabolism; Biosynthesis of Other Secondary Metabolites; Indole alkaloid biosynthesis
Influenza A	8125	6630	4877	5979	8558	8111	Human Diseases; Infectious Diseases; Influenza A
Inorganic ion transport and metabolism	132997	83545	79813	111418	114469	131161	Unclassified; Cellular Processes and Signaling; Inorganic ion transport and metabolism
Inositol phosphate metabolism	80943	52321	46921	71418	77013	87180	Metabolism; Carbohydrate Metabolism; Inositol phosphate metabolism
Insulin signaling pathway	19734	11723	12094	16925	20083	19218	Organismal Systems; Endocrine System; Insulin signaling pathway
Ion channels	10057	5896	5183	7990	9027	9965	Environmental Information Processing; Signaling Molecules and Interaction; Ion channels
Isoflavonoid biosynthesis	236	335	308	192	1413	454	Metabolism; Biosynthesis of Other Secondary Metabolites; Isoflavonoid biosynthesis
Isoquinoline alkaloid biosynthesis	23718	15414	14333	19944	22504	24294	Metabolism; Biosynthesis of Other Secondary Metabolites; Isoquinoline alkaloid biosynthesis
Leishmaniasis	6	18	7	24	27	21	Human Diseases; Infectious Diseases; Leishmaniasis
Leukocyte transendothelial migration	48	46	90	68	70	73	Organismal Systems; Immune System; Leukocyte transendothelial migration
Limonene and pinene degradation	121822	99582	83530	117558	145774	148350	Metabolism; Metabolism of Terpenoids and Polyketides; Limonene and pinene degradation
Linoleic acid metabolism	21375	16109	13692	19002	22561	23540	Metabolism; Lipid Metabolism; Linoleic acid metabolism
Lipid biosynthesis proteins	278931	193939	179015	244395	294529	301689	Metabolism; Lipid Metabolism; Lipid biosynthesis proteins
Lipid metabolism	41545	26369	25126	33828	41320	44866	Unclassified; Metabolism; Lipid metabolism
Lipoic acid metabolism	21534	14106	13498	19298	19411	22218	Metabolism; Metabolism of Cofactors and Vitamins; Lipoic acid metabolism
Lipopolysaccharide biosynthesis	136128	72800	75883	100007	114251	118605	Metabolism; Glycan Biosynthesis and Metabolism; Lipopolysaccharide biosynthesis
Lipopolysaccharide biosynthesis proteins	164379	89430	92206	122027	142617	145042	Metabolism; Glycan Biosynthesis and Metabolism; Lipopolysaccharide biosynthesis proteins
Long-term depression	0	0	0	0	0	0	Organismal Systems; Nervous System; Long-term depression
Long-term potentiation	0	0	0	0	0	0	Organismal Systems; Nervous System; Long-term potentiation
Lysine biosynthesis	188347	131027	123698	169557	200959	206609	Metabolism; Amino Acid Metabolism; Lysine biosynthesis
Lysine degradation	156613	123252	107488	147199	181733	184847	Metabolism; Amino Acid Metabolism; Lysine degradation
Lysosome	32896	15729	17265	25731	26561	30485	Cellular Processes; Transport and Catabolism; Lysosome
MAPK signaling pathway	0	0	0	0	0	0	Environmental Information Processing; Signal Transduction; MAPK signaling pathway
MAPK signaling pathway - yeast	9276	8099	7596	8688	12811	12583	Environmental Information Processing; Signal Transduction; MAPK signaling pathway - yeast
Measles	0	0	0	0	0	0	Human Diseases; Infectious Diseases; Measles
Meiosis - yeast	20692	15786	13530	17162	20624	22172	Cellular Processes; Cell Growth and Death; Meiosis - yeast
Melanogenesis	557	358	188	453	172	300	Organismal Systems; Endocrine System; Melanogenesis
Membrane and intracellular structural molecules	257324	162537	155629	199931	237613	243699	Unclassified; Cellular Processes and Signaling; Membrane and intracellular structural molecules
Metabolism of cofactors and vitamins	65253	43787	40576	56099	58747	66495	Unclassified; Metabolism; Metabolism of cofactors and vitamins
Metabolism of xenobiotics by cytochrome P450	72419	55234	46009	59129	74547	77356	Metabolism; Xenobiotics Biodegradation and Metabolism; Metabolism of xenobiotics by cytochrome P450
Methane metabolism	288318	211708	192301	261962	310811	323036	Metabolism; Energy Metabolism; Methane metabolism
Mineral absorption	3759	2419	2445	3115	2099	3696	Organismal Systems; Digestive System; Mineral absorption
Mismatch repair	183765	128246	120174	164742	193966	198619	Genetic Information Processing; Replication and Repair; Mismatch repair
N-Glycan biosynthesis	13975	9362	9122	12865	14791	14315	Metabolism; Glycan Biosynthesis and Metabolism; N-Glycan biosynthesis
NOD-like receptor signaling pathway	5111	3414	3579	4453	4708	4858	Organismal Systems; Immune System; NOD-like receptor signaling pathway
Naphthalene degradation	81069	61399	52465	71903	86145	89934	Metabolism; Xenobiotics Biodegradation and Metabolism; Naphthalene degradation
Neuroactive ligand-receptor interaction	8	30	7	8	6	11	Environmental Information Processing; Signaling Molecules and Interaction; Neuroactive ligand-receptor interaction
Neurotrophin signaling pathway	0	0	0	0	0	0	Organismal Systems; Nervous System; Neurotrophin signaling pathway
Nicotinate and nicotinamide metabolism	126272	86545	81057	114270	126634	136389	Metabolism; Metabolism of Cofactors and Vitamins; Nicotinate and nicotinamide metabolism
Nitrogen metabolism	236699	164642	149962	207739	247364	258908	Metabolism; Energy Metabolism; Nitrogen metabolism
Nitrotoluene degradation	32243	23261	20599	28541	32113	35387	Metabolism; Xenobiotics Biodegradation and Metabolism; Nitrotoluene degradation
Non-homologous end-joining	31133	20572	17991	26515	30466	32319	Genetic Information Processing; Replication and Repair; Non-homologous end-joining
Notch signaling pathway	316	134	178	240	225	258	Environmental Information Processing; Signal Transduction; Notch signaling pathway
Novobiocin biosynthesis	41381	29760	27906	37816	47276	47100	Metabolism; Biosynthesis of Other Secondary Metabolites; Novobiocin biosynthesis
Nucleotide excision repair	106657	73405	68365	97535	113546	116565	Genetic Information Processing; Replication and Repair; Nucleotide excision repair
Nucleotide metabolism	2297	3321	3028	3735	5716	6027	Unclassified; Metabolism; Nucleotide metabolism
Olfactory transduction	0	0	0	0	0	0	Organismal Systems; Sensory System; Olfactory transduction
One carbon pool by folate	137326	99736	93534	126023	151412	154069	Metabolism; Metabolism of Cofactors and Vitamins; One carbon pool by folate
Oocyte meiosis	0	0	0	0	0	0	Cellular Processes; Cell Growth and Death; Oocyte meiosis
Other glycan degradation	62618	30526	30873	47199	52289	54204	Metabolism; Glycan Biosynthesis and Metabolism; Other glycan degradation
Other ion-coupled transporters	295477	199788	188198	249353	294662	304316	Unclassified; Cellular Processes and Signaling; Other ion-coupled transporters
Other transporters	78137	51122	47073	63257	74096	76921	Unclassified; Cellular Processes and Signaling; Other transporters
Other types of O-glycan biosynthesis	1	2	0	0	1	0	Metabolism; Glycan Biosynthesis and Metabolism; Other types of O-glycan biosynthesis
Others	325757	214987	199548	277116	317954	337045	Unclassified; Metabolism; Others
Oxidative phosphorylation	495404	329023	313450	420409	498260	510028	Metabolism; Energy Metabolism; Oxidative phosphorylation
PPAR signaling pathway	68553	49409	43520	64423	74544	79692	Organismal Systems; Endocrine System; PPAR signaling pathway
Pancreatic cancer	0	0	0	0	0	0	Human Diseases; Cancers; Pancreatic cancer
Pancreatic secretion	8	30	7	8	6	11	Organismal Systems; Digestive System; Pancreatic secretion
Pantothenate and CoA biosynthesis	175833	123247	115139	157497	185606	193236	Metabolism; Metabolism of Cofactors and Vitamins; Pantothenate and CoA biosynthesis
Parkinson's disease	23915	17674	14951	18216	22588	22829	Human Diseases; Neurodegenerative Diseases; Parkinson's disease
Pathogenic Escherichia coli infection	78	66	120	93	145	103	Human Diseases; Infectious Diseases; Pathogenic Escherichia coli infection
Pathways in cancer	19419	14780	13006	16752	19425	20438	Human Diseases; Cancers; Pathways in cancer
Penicillin and cephalosporin biosynthesis	36571	20305	19413	27675	30976	33182	Metabolism; Biosynthesis of Other Secondary Metabolites; Penicillin and cephalosporin biosynthesis
Pentose and glucuronate interconversions	166619	101041	95253	142579	155629	165542	Metabolism; Carbohydrate Metabolism; Pentose and glucuronate interconversions
Pentose phosphate pathway	235528	153287	146091	207749	223194	244437	Metabolism; Carbohydrate Metabolism; Pentose phosphate pathway
Peptidases	545559	346443	330541	458678	532900	549505	Metabolism; Enzyme Families; Peptidases
Peptidoglycan biosynthesis	189204	129899	123751	170138	202565	208025	Metabolism; Glycan Biosynthesis and Metabolism; Peptidoglycan biosynthesis
Peroxisome	96308	67685	59645	83735	97856	103454	Cellular Processes; Transport and Catabolism; Peroxisome
Pertussis	13436	7609	7332	9098	11195	11516	Human Diseases; Infectious Diseases; Pertussis
Phagosome	48	46	90	68	70	73	Cellular Processes; Transport and Catabolism; Phagosome
Phenylalanine metabolism	133277	98552	87444	121453	147072	152117	Metabolism; Amino Acid Metabolism; Phenylalanine metabolism
Phenylalanine, tyrosine and tryptophan biosynthesis	216976	148408	141285	194558	225012	233609	Metabolism; Amino Acid Metabolism; Phenylalanine, tyrosine and tryptophan biosynthesis
Phenylpropanoid biosynthesis	52142	29975	28067	43866	47310	49894	Metabolism; Biosynthesis of Other Secondary Metabolites; Phenylpropanoid biosynthesis
Phosphatidylinositol signaling system	28245	19527	18892	24477	27569	29712	Environmental Information Processing; Signal Transduction; Phosphatidylinositol signaling system
Phosphonate and phosphinate metabolism	17352	12845	11622	13920	19543	19084	Metabolism; Metabolism of Other Amino Acids; Phosphonate and phosphinate metabolism
Phosphotransferase system (PTS)	17595	15557	13708	18596	20432	21989	Environmental Information Processing; Membrane Transport; Phosphotransferase system (PTS)
Photosynthesis	90431	59446	56107	80547	85338	96276	Metabolism; Energy Metabolism; Photosynthesis
Photosynthesis - antenna proteins	106	198	100	323	104	559	Metabolism; Energy Metabolism; Photosynthesis - antenna proteins
Photosynthesis proteins	94627	64040	59237	84761	90734	102223	Metabolism; Energy Metabolism; Photosynthesis proteins
Phototransduction	0	0	0	0	0	0	Organismal Systems; Sensory System; Phototransduction
Phototransduction - fly	48	46	90	68	70	73	Organismal Systems; Sensory System; Phototransduction - fly
Plant-pathogen interaction	42360	28078	27756	36680	41180	43416	Organismal Systems; Environmental Adaptation; Plant-pathogen interaction
Polycyclic aromatic hydrocarbon degradation	46759	36165	30376	44144	49481	53022	Metabolism; Xenobiotics Biodegradation and Metabolism; Polycyclic aromatic hydrocarbon degradation
Polyketide sugar unit biosynthesis	51988	33882	33120	46094	55968	54632	Metabolism; Metabolism of Terpenoids and Polyketides; Polyketide sugar unit biosynthesis
Pores ion channels	183621	118820	111858	142219	177211	185107	Unclassified; Cellular Processes and Signaling; Pores ion channels
Porphyrin and chlorophyll metabolism	251531	185118	170877	231539	269221	288669	Metabolism; Metabolism of Cofactors and Vitamins; Porphyrin and chlorophyll metabolism
Prenyltransferases	98773	68770	65312	91051	104180	108068	Metabolism; Metabolism of Terpenoids and Polyketides; Prenyltransferases
Primary bile acid biosynthesis	3611	3930	2812	4951	6752	6582	Metabolism; Lipid Metabolism; Primary bile acid biosynthesis
Primary immunodeficiency	15362	10445	9640	14795	17149	18512	Human Diseases; Immune System Diseases; Primary immunodeficiency
Prion diseases	4953	3093	2601	3852	4175	3888	Human Diseases; Neurodegenerative Diseases; Prion diseases
Progesterone-mediated oocyte maturation	5110	3413	3579	4453	4708	4858	Organismal Systems; Endocrine System; Progesterone-mediated oocyte maturation
Propanoate metabolism	314602	234988	207908	291255	345772	358300	Metabolism; Carbohydrate Metabolism; Propanoate metabolism
Prostate cancer	5110	3413	3579	4453	4708	4858	Human Diseases; Cancers; Prostate cancer
Proteasome	8001	6727	6319	9738	9684	11199	Genetic Information Processing; Folding, Sorting and Degradation; Proteasome
Protein digestion and absorption	6399	3815	3519	4817	5678	5645	Organismal Systems; Digestive System; Protein digestion and absorption
Protein export	163880	111150	103939	146541	166630	173255	Genetic Information Processing; Folding, Sorting and Degradation; Protein export
Protein folding and associated processing	240779	164067	154764	209346	236536	255580	Unclassified; Genetic Information Processing; Protein folding and associated processing
Protein kinases	137475	89460	88525	120250	138712	144484	Metabolism; Enzyme Families; Protein kinases
Protein processing in endoplasmic reticulum	18658	12803	13168	17262	18223	20518	Genetic Information Processing; Folding, Sorting and Degradation; Protein processing in endoplasmic reticulum
Proximal tubule bicarbonate reclamation	15404	8264	8351	12396	14148	15557	Organismal Systems; Excretory System; Proximal tubule bicarbonate reclamation
Purine metabolism	596362	414296	387508	535608	617872	648601	Metabolism; Nucleotide Metabolism; Purine metabolism
Pyrimidine metabolism	391189	272008	257755	355192	413844	428047	Metabolism; Nucleotide Metabolism; Pyrimidine metabolism
Pyruvate metabolism	322672	236191	218149	300151	344510	366920	Metabolism; Carbohydrate Metabolism; Pyruvate metabolism
RIG-I-like receptor signaling pathway	701	682	485	924	548	844	Organismal Systems; Immune System; RIG-I-like receptor signaling pathway
RNA degradation	130380	90026	85826	117163	134976	141627	Genetic Information Processing; Folding, Sorting and Degradation; RNA degradation
RNA polymerase	38113	26626	25215	34923	41089	42130	Genetic Information Processing; Transcription; RNA polymerase
RNA transport	20863	12762	12871	17274	22051	21134	Genetic Information Processing; Translation; RNA transport
Regulation of actin cytoskeleton	48	46	90	68	70	73	Cellular Processes; Cell Motility; Regulation of actin cytoskeleton
Renal cell carcinoma	5918	4661	4462	6132	5983	7274	Human Diseases; Cancers; Renal cell carcinoma
Renin-angiotensin system	6984	3188	3031	4807	4411	4934	Organismal Systems; Endocrine System; Renin-angiotensin system
Replication, recombination and repair proteins	227860	152802	147043	193523	226945	243110	Unclassified; Genetic Information Processing; Replication, recombination and repair proteins
Restriction enzyme	25138	15812	17203	21092	27168	23919	Unclassified; Genetic Information Processing; Restriction enzyme
Retinol metabolism	30340	22997	19558	27284	33706	34036	Metabolism; Metabolism of Cofactors and Vitamins; Retinol metabolism
Rheumatoid arthritis	0	0	0	0	0	0	Human Diseases; Immune System Diseases; Rheumatoid arthritis
Riboflavin metabolism	93118	62611	57953	82653	97378	100088	Metabolism; Metabolism of Cofactors and Vitamins; Riboflavin metabolism
Ribosome	521929	364456	344763	475617	560084	573974	Genetic Information Processing; Translation; Ribosome
Ribosome Biogenesis	319520	220393	213422	282272	331336	338361	Genetic Information Processing; Translation; Ribosome Biogenesis
Ribosome biogenesis in eukaryotes	14131	9801	9462	13087	14124	14713	Genetic Information Processing; Translation; Ribosome biogenesis in eukaryotes
Salivary secretion	0	0	0	0	0	0	Organismal Systems; Digestive System; Salivary secretion
Secondary bile acid biosynthesis	339	316	242	278	345	536	Metabolism; Lipid Metabolism; Secondary bile acid biosynthesis
Secretion system	562271	378117	347554	470600	549410	598086	Environmental Information Processing; Membrane Transport; Secretion system
Selenocompound metabolism	132497	88008	82098	111540	135825	135066	Metabolism; Metabolism of Other Amino Acids; Selenocompound metabolism
Sesquiterpenoid biosynthesis	26	102	22	34	30	37	Metabolism; Metabolism of Terpenoids and Polyketides; Sesquiterpenoid biosynthesis
Shigellosis	60	54	102	78	100	85	Human Diseases; Infectious Diseases; Shigellosis
Signal transduction mechanisms	147307	92471	90254	125774	148809	153499	Unclassified; Cellular Processes and Signaling; Signal transduction mechanisms
Small cell lung cancer	8075	6572	4787	5927	8509	8048	Human Diseases; Cancers; Small cell lung cancer
Sphingolipid metabolism	50059	26959	26817	39819	47138	49564	Metabolism; Lipid Metabolism; Sphingolipid metabolism
Spliceosome	0	0	0	0	0	0	Genetic Information Processing; Transcription; Spliceosome
Sporulation	11157	8329	6549	9973	12573	11929	Unclassified; Cellular Processes and Signaling; Sporulation
Staphylococcus aureus infection	663	999	896	865	1959	1696	Human Diseases; Infectious Diseases; Staphylococcus aureus infection
Starch and sucrose metabolism	250665	150305	140976	211771	237819	245546	Metabolism; Carbohydrate Metabolism; Starch and sucrose metabolism
Steroid biosynthesis	12793	6135	6060	9424	10710	10183	Metabolism; Lipid Metabolism; Steroid biosynthesis
Steroid hormone biosynthesis	8788	6994	6627	8350	10709	12226	Metabolism; Lipid Metabolism; Steroid hormone biosynthesis
Stilbenoid, diarylheptanoid and gingerol biosynthesis	16649	13206	10780	16078	19594	19887	Metabolism; Biosynthesis of Other Secondary Metabolites; Stilbenoid, diarylheptanoid and gingerol biosynthesis
Streptomycin biosynthesis	105284	68286	64986	93809	106348	110112	Metabolism; Biosynthesis of Other Secondary Metabolites; Streptomycin biosynthesis
Styrene degradation	45850	34681	28354	40006	50677	52884	Metabolism; Xenobiotics Biodegradation and Metabolism; Styrene degradation
Sulfur metabolism	116463	77761	73635	98239	119695	119030	Metabolism; Energy Metabolism; Sulfur metabolism
Sulfur relay system	99603	71160	67226	92353	107965	112471	Genetic Information Processing; Folding, Sorting and Degradation; Sulfur relay system
Synthesis and degradation of ketone bodies	58774	43773	37846	52877	62244	65218	Metabolism; Lipid Metabolism; Synthesis and degradation of ketone bodies
Systemic lupus erythematosus	104	84	214	117	188	330	Human Diseases; Immune System Diseases; Systemic lupus erythematosus
TGF-beta signaling pathway	0	0	0	0	0	0	Environmental Information Processing; Signal Transduction; TGF-beta signaling pathway
Taurine and hypotaurine metabolism	44722	31665	29077	39737	47316	49127	Metabolism; Metabolism of Other Amino Acids; Taurine and hypotaurine metabolism
Terpenoid backbone biosynthesis	156016	110762	103232	143651	168335	171192	Metabolism; Metabolism of Terpenoids and Polyketides; Terpenoid backbone biosynthesis
Tetracycline biosynthesis	46610	30369	29524	38655	45563	47816	Metabolism; Metabolism of Terpenoids and Polyketides; Tetracycline biosynthesis
Thiamine metabolism	108770	78889	73461	98258	125316	123660	Metabolism; Metabolism of Cofactors and Vitamins; Thiamine metabolism
Tight junction	48	46	90	68	70	73	Cellular Processes; Cell Communication; Tight junction
Toluene degradation	72186	51623	45113	63766	76122	76851	Metabolism; Xenobiotics Biodegradation and Metabolism; Toluene degradation
Toxoplasmosis	8070	6556	4780	5903	8483	8027	Human Diseases; Infectious Diseases; Toxoplasmosis
Transcription factors	503202	315934	293847	420877	464316	509884	Genetic Information Processing; Transcription; Transcription factors
Transcription machinery	316096	199646	198569	270964	319034	331905	Genetic Information Processing; Transcription; Transcription machinery
Transcription related proteins	791	410	584	732	843	889	Unclassified; Genetic Information Processing; Transcription related proteins
Translation factors	122920	84311	81638	109557	130879	133017	Genetic Information Processing; Translation; Translation factors
Translation proteins	216213	147401	141933	187640	224620	229834	Unclassified; Genetic Information Processing; Translation proteins
Transporters	1559992	1107530	1026676	1433256	1529169	1758287	Environmental Information Processing; Membrane Transport; Transporters
Tropane, piperidine and pyridine alkaloid biosynthesis	39285	28472	25953	35969	41497	42831	Metabolism; Biosynthesis of Other Secondary Metabolites; Tropane, piperidine and pyridine alkaloid biosynthesis
Tryptophan metabolism	223097	165375	142754	201323	237688	245777	Metabolism; Amino Acid Metabolism; Tryptophan metabolism
Tuberculosis	58286	38678	36170	49628	58384	60161	Human Diseases; Infectious Diseases; Tuberculosis
Two-component system	701047	462808	437956	588147	686289	732311	Environmental Information Processing; Signal Transduction; Two-component system
Type I diabetes mellitus	13578	9972	9109	13161	14365	15473	Human Diseases; Metabolic Diseases; Type I diabetes mellitus
Type II diabetes mellitus	10589	7178	6681	9359	9728	11964	Human Diseases; Metabolic Diseases; Type II diabetes mellitus
Tyrosine metabolism	157832	110924	97952	137385	158765	168962	Metabolism; Amino Acid Metabolism; Tyrosine metabolism
Ubiquinone and other terpenoid-quinone biosynthesis	94903	67944	65451	87314	99680	106138	Metabolism; Metabolism of Cofactors and Vitamins; Ubiquinone and other terpenoid-quinone biosynthesis
Ubiquitin system	9955	5912	5604	9177	10408	10406	Genetic Information Processing; Folding, Sorting and Degradation; Ubiquitin system
VEGF signaling pathway	6	18	7	24	27	21	Environmental Information Processing; Signal Transduction; VEGF signaling pathway
Valine, leucine and isoleucine biosynthesis	229572	165469	154976	214729	244048	260449	Metabolism; Amino Acid Metabolism; Valine, leucine and isoleucine biosynthesis
Valine, leucine and isoleucine degradation	301097	233900	204169	286523	348968	357351	Metabolism; Amino Acid Metabolism; Valine, leucine and isoleucine degradation
Various types of N-glycan biosynthesis	44	110	78	122	80	197	Metabolism; Glycan Biosynthesis and Metabolism; Various types of N-glycan biosynthesis
Vascular smooth muscle contraction	0	0	0	0	0	0	Organismal Systems; Circulatory System; Vascular smooth muscle contraction
Vasopressin-regulated water reabsorption	316	114	105	293	324	296	Organismal Systems; Excretory System; Vasopressin-regulated water reabsorption
Vibrio cholerae infection	585	183	308	375	283	326	Human Diseases; Infectious Diseases; Vibrio cholerae infection
Vibrio cholerae pathogenic cycle	22979	14744	14605	19702	22297	23762	Human Diseases; Infectious Diseases; Vibrio cholerae pathogenic cycle
Viral myocarditis	8117	6600	4870	5971	8552	8100	Human Diseases; Cardiovascular Diseases; Viral myocarditis
Vitamin B6 metabolism	49782	36682	34487	47285	55673	56972	Metabolism; Metabolism of Cofactors and Vitamins; Vitamin B6 metabolism
Wnt signaling pathway	316	134	178	240	225	258	Environmental Information Processing; Signal Transduction; Wnt signaling pathway
Xylene degradation	11563	11874	9198	12895	19253	17125	Metabolism; Xenobiotics Biodegradation and Metabolism; Xylene degradation
Zeatin biosynthesis	9596	6728	6435	8789	10367	10664	Metabolism; Metabolism of Terpenoids and Polyketides; Zeatin biosynthesis
alpha-Linolenic acid metabolism	11724	8475	8071	11998	12199	13110	Metabolism; Lipid Metabolism; alpha-Linolenic acid metabolism
beta-Alanine metabolism	146827	115886	100257	141776	170587	177765	Metabolism; Metabolism of Other Amino Acids; beta-Alanine metabolism
beta-Lactam resistance	24386	13162	12209	17263	19699	21429	Metabolism; Biosynthesis of Other Secondary Metabolites; beta-Lactam resistance
mRNA surveillance pathway	56	136	174	201	274	206	Genetic Information Processing; Translation; mRNA surveillance pathway
mTOR signaling pathway	0	0	0	0	0	0	Environmental Information Processing; Signal Transduction; mTOR signaling pathway
p53 signaling pathway	8217	6633	4910	5999	8603	8250	Cellular Processes; Cell Growth and Death; p53 signaling pathway
